# Supplementary material for: T Cells Expressing Receptor Recombination/Revision Machinery Are Detected in the Tumor Microenvironment and Expanded in Genomically Over-unstable Models
Source: Oxford University Press journal article supplement (doi:10.1158/2326-6066.cir-20-0645), 2021-05-03
Supplement: 23266066cir200645-sup-248581_3_supp_7028888_qsmmnm.xlsx [file 23266066cir200645-sup-248581_3_supp_7028888_qsmmnm.xlsx]

## Sheet: Foglio 1
Additional T-cell marker genes
CD8B
CD4
CD2
CD7
GZMB
GZMA
GZMM
GZMK
GZMH
PRKCQ
TRBC1
ITM2A
SH2D1A
CD96
NCALD
GIMAP5
TRA
SKAP1
